# Supplementary material for: Effects of Exercise and Physical Activity Levels on Childhood Cancer: An Umbrella Review
Source: MDPI journal article supplement (doi:10.3390/healthcare11060820), 2023-03-10
Supplement: s1 [file s1]

# Supplementary file

## Effects of exercise and physical activity levels on childhood cancer: an umbrella review

Christina Rapti,<sup>1</sup> Petros C. Dinas,<sup>2</sup> Costas Chryssanthopoulos,<sup>1</sup> Alexandra Mila<sup>1</sup> and Anastassios Philippou<sup>1</sup>

<sup>1</sup>Department of Physiology, Medical School, National and Kapodistrian University of Athens, Athens, 115 27, Greece; chrisrp@med.uoa.gr (C.R.); chryssan@phed.uoa.gr (C.C.); christogiannos13@gmail.com (A.M.)

<sup>2</sup>FAME Laboratory, Department of Physical Education and Sport Science, University of Thessaly, Trikala, 42100, Greece; petros.cd@gmail.com

\*Correspondence: tfilipou@med.uoa.gr

**Table of Contents**

*Key word algorithm PubMed ..... 3*

*Table S1. Overall risk of bias of original studies..... 10*

## Key word algorithm PubMed

100,(#13 AND #36 AND #98 AND #99),,,"("Cancer"[Title/Abstract] OR "pediatric cancer"[Title/Abstract] OR "pediatric cancer survivors"[Title/Abstract] OR "acute myeloid leukemia"[Title/Abstract] OR "myeloid leukemia"[Title/Abstract] OR "haematological cancer"[Title/Abstract] OR "malignant haematological disorders"[Title/Abstract] OR "solid tumor"[Title/Abstract] OR "non central nervous system cancer"[Title/Abstract] OR "central nervous system cancer"[Title/Abstract] OR "Neoplasms"[Title/Abstract] OR "cancer survivors"[Title/Abstract]) AND ("Exercise"[Title/Abstract] OR "exercise training"[Title/Abstract] OR "high intensity training"[Title/Abstract] OR "hit training"[Title/Abstract] OR "high intensity interval training"[Title/Abstract] OR "HIIT"[Title/Abstract] OR "aerobic exercise"[Title/Abstract] OR "aerobic training"[Title/Abstract] OR "endurance training"[Title/Abstract] OR "strength training"[Title/Abstract] OR "resistance training"[Title/Abstract] OR "weight training"[Title/Abstract] OR "continuous exercise"[Title/Abstract] OR "intermittent exercise"[Title/Abstract] OR "isometric exercise"[Title/Abstract] OR "plyometric exercise"[Title/Abstract] OR "low intensity exercise"[Title/Abstract] OR "low intensity exercise training"[Title/Abstract] OR "high intensity exercise"[Title/Abstract] OR "high intensity exercise training"[Title/Abstract] OR "moderate intensity exercise"[Title/Abstract] OR "exercise based rehabilitation"[Title/Abstract]) AND ("VO2"[Title/Abstract] OR "maximum oxygen consumption"[Title/Abstract] OR "VO2max"[Title/Abstract] OR "peak oxygen consumption"[Title/Abstract] OR "VO2peak"[Title/Abstract] OR "quality of life"[Title/Abstract] OR "QOL"[Title/Abstract] OR "health related quality of life"[Title/Abstract] OR "HRQOL"[Title/Abstract] OR "hospital admissions"[Title/Abstract] OR "Hospitalisation"[Title/Abstract] OR "Hospitalization"[Title/Abstract] OR "Rehospitalisation"[Title/Abstract] OR "Rehospitalization"[Title/Abstract] OR "Fatigue"[Title/Abstract] OR "muscle strength"[Title/Abstract] OR "muscular strength"[Title/Abstract] OR "Strength"[Title/Abstract] OR "Feasibility"[Title/Abstract] OR "aerobic capacity"[Title/Abstract] OR "Pain"[Title/Abstract] OR "Flexibility"[Title/Abstract] OR "Balance"[Title/Abstract] OR "gait impairments"[Title/Abstract] OR "functional mobility"[Title/Abstract] OR "body composition"[Title/Abstract] OR "body mass index"[Title/Abstract] OR "BMI"[Title/Abstract] OR "body fat"[Title/Abstract] OR "motor performance"[Title/Abstract] OR "activity energy expenditure"[Title/Abstract] OR "level of physical activity"[Title/Abstract] OR "Adherence"[Title/Abstract] OR "immune function"[Title/Abstract] OR "immune system"[Title/Abstract] OR "immune parameters"[Title/Abstract] OR "inflammation markers"[Title/Abstract] OR "inflammatory markers"[Title/Abstract] OR "cardiorespiratory fitness"[Title/Abstract] OR "physical fitness"[Title/Abstract] OR "physical activity"[Title/Abstract] OR "cardiovascular function"[Title/Abstract] OR "cardiovascular structure"[Title/Abstract] OR 80[UID] OR "bone mineral density"[Title/Abstract] OR "Coordination"[Title/Abstract] OR "risk of infection"[Title/Abstract] OR "exercise capacity"[Title/Abstract] OR "Endurance"[Title/Abstract] OR "Sleep"[Title/Abstract] OR "motor function"[Title/Abstract] OR "ankle dorsiflexion"[Title/Abstract] OR "general health domain"[Title/Abstract] OR "psychosocial health"[Title/Abstract] OR "functional capacity"[Title/Abstract] OR "body structure"[Title/Abstract] OR "body function"[Title/Abstract] OR "Activity"[Title/Abstract] OR "Participation"[Title/Abstract] OR "Freedom"[Title/Abstract] OR "adverse effects"[Title/Abstract]) AND "systematic review"[Title/Abstract]",682,09:13:04

99,Systematic review[Title/Abstract],,,""systematic review"[Title/Abstract]", "250,484",09:12:00

98,(#37 OR #38 OR #39 OR #40 OR #41 OR #42 OR #43 OR #44 OR #45 OR #46 OR #47 OR #48 OR #49 OR #50 OR #51 OR #52 OR #53 OR #54 OR #55 OR #56 OR #57 OR #58 OR #59 OR #60 OR #61 OR #62 OR #63 OR #64 OR #65 OR #66 OR #67 OR #68 OR #69 OR #70 OR #71 OR #72 OR #73 OR #74 OR #75 OR #76 OR #77 OR #78 OR #79 OR #80 OR #81 OR #82 OR #83 OR #84 OR #85 OR #86 OR #87 OR #88 OR #89 OR #90 OR #91 OR #92 OR #93 OR #94 OR #95 OR #96 OR #97),,,""VO2"[Title/Abstract] OR "maximum oxygen consumption"[Title/Abstract] OR "VO2max"[Title/Abstract] OR "peak oxygen consumption"[Title/Abstract] OR "VO2peak"[Title/Abstract] OR "quality of life"[Title/Abstract] OR "QOL"[Title/Abstract] OR "health related quality of life"[Title/Abstract] OR "HRQOL"[Title/Abstract] OR "hospital admissions"[Title/Abstract] OR "Hospitalisation"[Title/Abstract] OR "Hospitalization"[Title/Abstract] OR "Rehospitalisation"[Title/Abstract] OR "Rehospitalization"[Title/Abstract] OR "Fatigue"[Title/Abstract] OR "muscle strength"[Title/Abstract] OR "muscular strength"[Title/Abstract] OR "Strength"[Title/Abstract] OR "Feasibility"[Title/Abstract] OR "aerobic capacity"[Title/Abstract] OR "Pain"[Title/Abstract] OR "Flexibility"[Title/Abstract] OR "Balance"[Title/Abstract] OR "gait impairments"[Title/Abstract] OR "functional mobility"[Title/Abstract] OR "body composition"[Title/Abstract] OR "body mass index"[Title/Abstract] OR "BMI"[Title/Abstract] OR "body fat"[Title/Abstract] OR "motor performance"[Title/Abstract] OR "activity energy expenditure"[Title/Abstract] OR "level of physical activity"[Title/Abstract] OR "Adherence"[Title/Abstract] OR "immune function"[Title/Abstract] OR "immune system"[Title/Abstract] OR "immune parameters"[Title/Abstract] OR "inflammation markers"[Title/Abstract] OR "inflammatory markers"[Title/Abstract] OR "cardiorespiratory fitness"[Title/Abstract] OR "physical fitness"[Title/Abstract] OR "physical activity"[Title/Abstract] OR "cardiovascular function"[Title/Abstract] OR "cardiovascular structure"[Title/Abstract] OR 80[UID] OR "bone mineral density"[Title/Abstract] OR "Coordination"[Title/Abstract] OR "risk of infection"[Title/Abstract] OR "exercise capacity"[Title/Abstract] OR "Endurance"[Title/Abstract] OR "Sleep"[Title/Abstract] OR "motor function"[Title/Abstract] OR "ankle dorsiflexion"[Title/Abstract] OR "general health domain"[Title/Abstract] OR "psychosocial health"[Title/Abstract] OR "functional capacity"[Title/Abstract] OR "body structure"[Title/Abstract] OR "body function"[Title/Abstract] OR "Activity"[Title/Abstract] OR "Participation"[Title/Abstract] OR "Freedom"[Title/Abstract] OR "adverse effects"[Title/Abstract]", "6,121,696",09:10:30

97,Adverse effects[Title/Abstract],,,""adverse effects"[Title/Abstract]", "160,800",08:55:07

96, Freedom[Title/Abstract],,, ""Freedom""[Title/Abstract]", "55,957", 08:54:47

95, Participation[Title/Abstract],,, ""Participation""[Title/Abstract]", "178,991", 08:54:27

94, Activity[Title/Abstract],,, ""Activity""[Title/Abstract]", "3,015,066", 08:54:02

93, Body function[Title/Abstract],,, ""body function""[Title/Abstract]", "1,368", 08:53:44

92, Body structure[Title/Abstract],,, ""body structure""[Title/Abstract]", "1,007", 08:53:24

91, Functional capacity[Title/Abstract],,, ""functional capacity""[Title/Abstract]", "15,781", 08:52:26

90, Psychosocial health[Title/Abstract],,, ""psychosocial health""[Title/Abstract]", "2,185", 08:52:09

89, General health domain[Title/Abstract],,, ""general health domain""[Title/Abstract]", "83,08:51:47

88, Ankle dorsiflexion[Title/Abstract],,, ""ankle dorsiflexion""[Title/Abstract]", "2,612", 08:49:54

87, Motor function[Title/Abstract],,, ""motor function""[Title/Abstract]", "27,786", 08:49:38

86, Sleep[Title/Abstract],,, ""Sleep""[Title/Abstract]", "204,237", 08:49:21

85, Endurance[Title/Abstract],,, ""Endurance""[Title/Abstract]", "36,415", 08:49:05

84, Exercise capacity[Title/Abstract],,, ""exercise capacity""[Title/Abstract]", "15,437", 08:46:00

83, Risk of infection[Title/Abstract],,, ""risk of infection""[Title/Abstract]", "17,438", 08:45:00

82, Coordination[Title/Abstract],,, ""Coordination""[Title/Abstract]", "134,119", 08:44:39

81, Bone mineral density[Title/Abstract],,, ""bone mineral density""[Title/Abstract]", "47,073", 08:43:52

80, Range of motion[Title/Abstract],,, ""range of motion""[Title/Abstract]", "42,307", 08:43:36

79, Cardiovascular structure[Title/Abstract],,, ""cardiovascular structure""[Title/Abstract]", "413,08:43:15

78, Cardiovascular function[Title/Abstract],,, ""cardiovascular function""[Title/Abstract]", "7,529", 08:42:58

77, Physical activity[Title/Abstract],,, ""physical activity""[Title/Abstract]", "141,553", 08:42:43

76, Physical fitness[Title/Abstract],,, ""physical fitness""[Title/Abstract]", "12,949", 08:42:18

75, Cardiorespiratory fitness[Title/Abstract],,, ""cardiorespiratory fitness""[Title/Abstract]", "7,141", 08:42:00

74, Inflammatory markers[Title/Abstract],,, ""inflammatory markers""[Title/Abstract]", "27,238", 08:41:42

73, Inflammation markers[Title/Abstract],,, ""inflammation markers""[Title/Abstract]", "3,408", 08:41:27

72, Immune parameters[Title/Abstract],,, ""immune parameters""[Title/Abstract]", "3,848", 08:41:10

71, Immune system[Title/Abstract],,, ""immune system""[Title/Abstract]", "137,916", 08:40:48

70, Immune function[Title/Abstract],,, ""immune function""[Title/Abstract]", "24,983", 08:40:27

69, Adherence[Title/Abstract],,, ""Adherence""[Title/Abstract]", "151,202", 08:40:10

68, Level of physical activity[Title/Abstract],,, ""level of physical activity""[Title/Abstract]", "3,998", 08:39:52

67, Activity energy expenditure[Title/Abstract],,, ""activity energy expenditure""[Title/Abstract]", "767,08:39:31

66, Motor performance[Title/Abstract],,, ""motor performance""[Title/Abstract]", "9,327", 08:39:11

65, Body fat[Title/Abstract],,, ""body fat""[Title/Abstract]", "36,978", 08:38:42

64, BMI[Title/Abstract],,, ""BMI""[Title/Abstract]", "185,211", 08:38:22

63, Body mass index[Title/Abstract],,, ""body mass index""[Title/Abstract]", "227,792", 08:37:35

62, Body composition[Title/Abstract],,, ""body composition""[Title/Abstract]", "44,817", 08:36:57

61, Functional mobility[Title/Abstract],,, ""functional mobility""[Title/Abstract]", "2,099", 08:36:24

60, Gait impairments[Title/Abstract],,, ""gait impairments""[Title/Abstract]", "478,08:35:35

59, Balance[Title/Abstract],,, ""Balance""[Title/Abstract]", "267,181", 08:34:24

58, Flexibility[Title/Abstract],,, ""Flexibility""[Title/Abstract]", "92,738", 08:34:01

57, Pain[Title/Abstract],,, ""Pain""[Title/Abstract]", "745,484", 08:33:34

56, Aerobic capacity[Title/Abstract],,, ""aerobic capacity""[Title/Abstract]", "6,232", 08:33:13

55, Feasibility[Title/Abstract],,, ""Feasibility""[Title/Abstract]", "231,717", 08:31:35

54, Strength[Title/Abstract],,, ""Strength""[Title/Abstract]", "360,659", 08:31:10

53, Muscular strength[Title/Abstract],,, ""muscular strength""[Title/Abstract]", "4,236", 08:30:32

52, Muscle strength[Title/Abstract],,, ""muscle strength""[Title/Abstract]", "28,301", 08:29:50

51, Fatigue[Title/Abstract],,, ""Fatigue""[Title/Abstract]", "119,349", 07:53:34

50, Rehospitalization[Title/Abstract],,, ""Rehospitalization""[Title/Abstract]", "6,973", 07:52:02

49, Rehospitalisation[Title/Abstract],,, ""Rehospitalisation""[Title/Abstract]", "862,07:51:00

48, Hospitalization[Title/Abstract],,, ""Hospitalization""[Title/Abstract]", "160,753", 07:50:32

47, Hospitalisation[Title/Abstract],,, ""Hospitalisation""[Title/Abstract]", "20,229", 07:49:59

46, Hospital admissions[Title/Abstract],,, ""hospital admissions""[Title/Abstract]", "21,081", 07:49:19

45, HRQOL[Title/Abstract],,, ""HRQOL""[Title/Abstract]", "22,607", 07:48:50

44, Health related quality of life[Title/Abstract],,, ""health related quality of life""[Title/Abstract]", "56,651", 07:48:32

43, QOL[Title/Abstract],,, ""QOL""[Title/Abstract]", "50,091", 07:48:07

42, Quality of life[Title/Abstract],,, ""quality of life""[Title/Abstract]", "348,301", 07:47:48

41, VO2peak[Title/Abstract],,, ""VO2peak""[Title/Abstract]", "4,688", 07:47:20

40, Peak oxygen consumption[Title/Abstract],,, ""peak oxygen consumption""[Title/Abstract]", "3,444", 07:46:58

39,VO2max[Title/Abstract],,,,"VO2max"[Title/Abstract],"12,012",07:46:35

38,Maximum oxygen consumption[Title/Abstract],,,,"maximum oxygen consumption"[Title/Abstract],"1,166",07:45:33

37,VO2[Title/Abstract],,,,"VO2"[Title/Abstract],"19,777",07:44:41

36,(#14 OR #15 OR #16 OR #17 OR #18 OR #19 OR #20 OR #21 OR #22 OR #23 OR #24 OR #25 OR #26 OR #27 OR #28 OR #29 OR #30 OR #31 OR #32 OR #33 OR #34 OR #35),,,,"Exercise"[Title/Abstract] OR "exercise training"[Title/Abstract] OR "high intensity training"[Title/Abstract] OR "hit training"[Title/Abstract] OR "high intensity interval training"[Title/Abstract] OR "HIIT"[Title/Abstract] OR "aerobic exercise"[Title/Abstract] OR "aerobic training"[Title/Abstract] OR "endurance training"[Title/Abstract] OR "strength training"[Title/Abstract] OR "resistance training"[Title/Abstract] OR "weight training"[Title/Abstract] OR "continuous exercise"[Title/Abstract] OR "intermittent exercise"[Title/Abstract] OR "isometric exercise"[Title/Abstract] OR "plyometric exercise"[Title/Abstract] OR "low intensity exercise"[Title/Abstract] OR "low intensity exercise training"[Title/Abstract] OR "high intensity exercise"[Title/Abstract] OR "high intensity exercise training"[Title/Abstract] OR "moderate intensity exercise"[Title/Abstract] OR "exercise based rehabilitation"[Title/Abstract],"322,176",07:43:43

35,Exercise based rehabilitation[Title/Abstract],,,,"exercise based rehabilitation"[Title/Abstract],"232,07:37:34

34,Moderate intensity exercise[Title/Abstract],,,,"moderate intensity exercise"[Title/Abstract],"2,233",07:37:04

33,High intensity exercise training[Title/Abstract],,,,"high intensity exercise training"[Title/Abstract],"230,07:36:38

32,High intensity exercise[Title/Abstract],,,,"high intensity exercise"[Title/Abstract],"3,290",07:36:02

31,Low intensity exercise training[Title/Abstract],,,,"low intensity exercise training"[Title/Abstract],"84,07:35:38

30,Low intensity exercise[Title/Abstract],,,,"low intensity exercise"[Title/Abstract],"1,115",07:35:17

29,Plyometric exercise[Title/Abstract],,,,"plyometric exercise"[Title/Abstract],"181,07:28:16

28,Isometric exercise[Title/Abstract],,,,"isometric exercise"[Title/Abstract],"1,804",07:27:52

27,Intermittent exercise[Title/Abstract],,,,"intermittent exercise"[Title/Abstract],"1,234",07:27:02

26,Continuous exercise[Title/Abstract],,,,"continuous exercise"[Title/Abstract],"851,07:26:27

25,Weight training[Title/Abstract],,,,"weight training"[Title/Abstract],"1,151",07:26:04

24,Resistance training[Title/Abstract],,,,"resistance training"[Title/Abstract],"10,850",07:24:03

23,Strength training[Title/Abstract],,,,"strength training"[Title/Abstract],"6,486",07:23:43

22,Endurance training[Title/Abstract],,,,"endurance training"[Title/Abstract],"5,355",07:23:09

21,Aerobic training[Title/Abstract],,,,"aerobic training"[Title/Abstract],"3,083",07:22:51

20,Aerobic exercise[Title/Abstract],,,,"aerobic exercise"[Title/Abstract],"12,031",07:22:23

19,HIIT[Title/Abstract],,,,"HIIT"[Title/Abstract],"1,929",07:19:08

18,High intensity interval training[Title/Abstract],,,,"high intensity interval training"[Title/Abstract],"2,749",07:18:51

17,HIT training[Title/Abstract],,,,"hit training"[Title/Abstract],"22,07:18:26

16,High intensity training[Title/Abstract],,,,"high intensity training"[Title/Abstract],"935,07:18:07

15,Exercise training[Title/Abstract],,,,"exercise training"[Title/Abstract],"20,308",07:17:49

14,Exercise[Title/Abstract],,,,"Exercise"[Title/Abstract],"312,451",07:03:02

13,(#1 OR #2 OR #3 OR #4 OR #5 OR #6 OR #7 OR #8 OR #9 OR #10 OR #11 OR #12),,,,"Cancer"[Title/Abstract] OR "pediatric cancer"[Title/Abstract] OR "pediatric cancer survivors"[Title/Abstract] OR "acute myeloid leukemia"[Title/Abstract] OR "myeloid leukemia"[Title/Abstract] OR "haematological cancer"[Title/Abstract] OR "malignant haematological disorders"[Title/Abstract] OR "solid tumor"[Title/Abstract] OR "non central nervous system cancer"[Title/Abstract] OR "central nervous system cancer"[Title/Abstract] OR "Neoplasms"[Title/Abstract] OR "cancer survivors"[Title/Abstract],"2,310,171",07:01:26

12,Cancer survivors[Title/Abstract],,,,"cancer survivors"[Title/Abstract],"21,364",06:56:22

11,Neoplasms[Title/Abstract],,,,"Neoplasms"[Title/Abstract],"241,358",06:55:59

10,Central nervous system cancer[Title/Abstract],,,,"central nervous system cancer"[Title/Abstract],"174,06:55:26

9,Non-central nervous system cancer[Title/Abstract],,,,"non central nervous system cancer"[Title/Abstract],"29,06:53:54

8,Solid tumor[Title/Abstract],,,,"solid tumor"[Title/Abstract],"13,994",06:53:17

7,Malignant haematological disorders[Title/Abstract],,,,"malignant haematological disorders"[Title/Abstract],"62,06:52:48

6,Haematological cancer[Title/Abstract],,,,"haematological cancer"[Title/Abstract],"393,06:41:08

5,Myeloid leukemia[Title/Abstract],,,,"myeloid leukemia"[Title/Abstract],"53,834",06:40:39

4,Acute myeloid leukemia[Title/Abstract],,,,"acute myeloid leukemia"[Title/Abstract],"36,761",06:39:54

3,Pediatric cancer survivors[Title/Abstract],,,,"pediatric cancer survivors"[Title/Abstract],"354,06:39:15

2,Pediatric cancer[Title/Abstract],,,,"pediatric cancer"[Title/Abstract],"4,475",06:38:36

1,Cancer[Title/Abstract],,,,"Cancer"[Title/Abstract],"2,085,814",06:38:15

## Key word algorithm Cochrane

ID      Search

|     |                                    |
|-----|------------------------------------|
| #1  | Cancer                             |
| #2  | Pediatric cancer                   |
| #3  | Pediatric cancer survivors         |
| #4  | Acute myeloid leukemia             |
| #5  | Myeloid leukemia                   |
| #6  | Haematological cancer              |
| #7  | Malignant haematological disorders |
| #8  | Solid tumor                        |
| #9  | Non-central nervous system cancer  |
| #10 | Central nervous system cancer      |
| #11 | Neoplasms                          |
| #12 | Cancer survivors                   |
| #13 | {OR #1-#12}                        |
| #14 | Exercise                           |
| #15 | Exercise training                  |
| #16 | High intensity training            |
| #17 | HIT training                       |
| #18 | High intensity interval training   |
| #19 | HIIT                               |
| #20 | Aerobic exercise                   |
| #21 | Aerobic training                   |
| #22 | Endurance training                 |
| #23 | Strength training                  |
| #24 | Resistance training                |
| #25 | Weight training                    |
| #26 | Continuous exercise                |
| #27 | Intermittent exercise              |
| #28 | Isometric exercise                 |
| #29 | Plyometric exercise                |
| #30 | Low intensity exercise             |
| #31 | Low intensity exercise training    |
| #32 | High intensity exercise            |
| #33 | High intensity exercise training   |
| #34 | Moderate intensity exercise        |
| #35 | Exercise based rehabilitation      |
| #36 | {OR #14-#35}                       |
| #37 | VO2                                |
| #38 | Maximum oxygen consumption         |
| #39 | VO2max                             |
| #40 | Peak oxygen consumption            |
| #41 | VO2peak                            |
| #42 | Quality of life                    |
| #43 | QOL                                |
| #44 | Health related quality of life     |
| #45 | HRQOL                              |
| #46 | Hospital admissions                |
| #47 | Hospitalisation                    |
| #48 | Hospitalization                    |
| #49 | Rehospitalisation                  |
| #50 | Rehospitalization                  |
| #51 | Fatigue                            |
| #52 | Muscle strength                    |
| #53 | Muscular strength                  |
| #54 | Strength                           |
| #55 | Feasibility                        |
| #56 | Aerobic capacity                   |
| #57 | Pain                               |

|      |                             |
|------|-----------------------------|
| #58  | Flexibility                 |
| #59  | Balance                     |
| #60  | Gait impairments            |
| #61  | Functional mobility         |
| #62  | Body composition            |
| #63  | Body mass index             |
| #64  | BMI                         |
| #65  | Body fat                    |
| #66  | Motor performance           |
| #67  | Activity energy expenditure |
| #68  | Level of physical activity  |
| #69  | Adherence                   |
| #70  | Immune function             |
| #71  | Immune system               |
| #72  | Immune parameters           |
| #73  | Inflammation markers        |
| #74  | Inflammatory markers        |
| #75  | Cardiorespiratory fitness   |
| #76  | Physical fitness            |
| #77  | Physical activity           |
| #78  | Cardiovascular function     |
| #79  | Cardiovascular structure    |
| #80  | Range of motion             |
| #81  | Bone mineral density        |
| #82  | Coordination                |
| #83  | Risk of infection           |
| #84  | Exercise capacity           |
| #85  | Endurance                   |
| #86  | Sleep                       |
| #87  | Motor function              |
| #88  | Ankle dorsiflexion          |
| #89  | General health domain       |
| #90  | Psychosocial health         |
| #91  | Functional capacity         |
| #92  | Body structure              |
| #93  | Body function               |
| #94  | Activity                    |
| #95  | Participation               |
| #96  | Freedom                     |
| #97  | Adverse effects             |
| #98  | {OR #37-#97}                |
| #99  | Systematic review           |
| #100 | {AND #13, #36, #98, #99}    |

### Key word algorithm Embase

|   |                                           |         |    |
|---|-------------------------------------------|---------|----|
| 1 | Cancer.ab,ti.                             | 2828140 |    |
| 2 | Pediatric cancer.ab,ti.                   | 6962    |    |
| 3 | Pediatric cancer survivors.ab,ti.         | 613     |    |
| 4 | Acute myeloid leukemia.ab,ti.             | 63094   |    |
| 5 | Myeloid leukemia.ab,ti.                   | 87782   |    |
| 6 | Haematological cancer.ab,ti.              | 625     |    |
| 7 | Malignant haematological disorders.ab,ti. |         | 82 |
| 8 | Solid tumor.ab,ti.                        | 22368   |    |

|    |                                                                                                                               |         |
|----|-------------------------------------------------------------------------------------------------------------------------------|---------|
| 9  | Non-central nervous system cancer.ab,ti.                                                                                      | 33      |
| 10 | Central nervous system cancer.ab,ti.                                                                                          | 223     |
| 11 | Neoplasms.ab,ti.                                                                                                              | 124038  |
| 12 | Cancer survivors.ab,ti.                                                                                                       | 32074   |
| 13 | 1 or 2 or 3 or 4 or 5 or 6 or 7 or 8 or 9 or 10 or 11 or 12                                                                   | 2999788 |
| 14 | Exercise.ab,ti.                                                                                                               | 391536  |
| 15 | Exercise training.ab,ti.                                                                                                      | 26693   |
| 16 | High intensity training.ab,ti.                                                                                                | 1045    |
| 17 | HIT training.ab,ti.                                                                                                           | 31      |
| 18 | High intensity interval training.ab,ti.                                                                                       | 3172    |
| 19 | HIIT.ab,ti.                                                                                                                   | 2331    |
| 20 | Aerobic exercise.ab,ti.                                                                                                       | 15926   |
| 21 | Aerobic training.ab,ti.                                                                                                       | 4288    |
| 22 | Endurance training.ab,ti.                                                                                                     | 6441    |
| 23 | Strength training.ab,ti.                                                                                                      | 7435    |
| 24 | Resistance training.ab,ti.                                                                                                    | 11719   |
| 25 | Weight training.ab,ti.                                                                                                        | 1218    |
| 26 | Continuous exercise.ab,ti.                                                                                                    | 1016    |
| 27 | Intermittent exercise.ab,ti.                                                                                                  | 1252    |
| 28 | Isometric exercise.ab,ti.                                                                                                     | 1977    |
| 29 | Plyometric exercise.ab,ti.                                                                                                    | 138     |
| 30 | Low intensity exercise.ab,ti.                                                                                                 | 1374    |
| 31 | Low intensity exercise training.ab,ti.                                                                                        | 105     |
| 32 | High intensity exercise.ab,ti.                                                                                                | 3866    |
| 33 | High intensity exercise training.ab,ti.                                                                                       | 323     |
| 34 | Moderate intensity exercise.ab,ti.                                                                                            | 2761    |
| 35 | Exercise based rehabilitation.ab,ti.                                                                                          | 316     |
| 36 | 14 or 15 or 16 or 17 or 18 or 19 or 20 or 21 or 22 or 23 or 24 or 25 or 26 or 27 or 28 or 29 or 30 or 31 or 32 or 33 or 34 or |         |
| 35 | 403398                                                                                                                        |         |
| 37 | VO2.ab,ti.                                                                                                                    | 24980   |
| 38 | Maximum oxygen consumption.ab,ti.                                                                                             | 1427    |
| 39 | VO2max.ab,ti.                                                                                                                 | 12172   |
| 40 | Peak oxygen consumption.ab,ti.                                                                                                | 4824    |
| 41 | VO2peak.ab,ti.                                                                                                                | 5937    |
| 42 | Quality of life.ab,ti.                                                                                                        | 552010  |
| 43 | QOL.ab,ti.                                                                                                                    | 92287   |
| 44 | Health related quality of life.ab,ti.                                                                                         | 79548   |
| 45 | HRQOL.ab,ti.                                                                                                                  | 34553   |
| 46 | Hospital admissions.ab,ti.                                                                                                    | 34016   |
| 47 | Hospitalisation.ab,ti.                                                                                                        | 32579   |
| 48 | Hospitalization.ab,ti.                                                                                                        | 262621  |
| 49 | Rehospitalisation.ab,ti.                                                                                                      | 1327    |
| 50 | Rehospitalization.ab,ti.                                                                                                      | 8842    |
| 51 | Fatigue.ab,ti.                                                                                                                | 186179  |
| 52 | Muscle strength.ab,ti.                                                                                                        | 38324   |
| 53 | Muscular strength.ab,ti.                                                                                                      | 5218    |
| 54 | Strength.ab,ti.                                                                                                               | 400647  |
| 55 | Feasibility.ab,ti.                                                                                                            | 317420  |
| 56 | Aerobic capacity.ab,ti.                                                                                                       | 7569    |
| 57 | Pain.ab,ti.                                                                                                                   | 1077406 |
| 58 | Flexibility.ab,ti.                                                                                                            | 101481  |
| 59 | Balance.ab,ti.                                                                                                                | 317899  |



|     |                                                                                                                                                                                                                                                                                                                                                                            |         |
|-----|----------------------------------------------------------------------------------------------------------------------------------------------------------------------------------------------------------------------------------------------------------------------------------------------------------------------------------------------------------------------------|---------|
| 60  | Gait impairments.ab,ti.                                                                                                                                                                                                                                                                                                                                                    | 698     |
| 61  | Functional mobility.ab,ti.                                                                                                                                                                                                                                                                                                                                                 | 3180    |
| 62  | Body composition.ab,ti.                                                                                                                                                                                                                                                                                                                                                    | 58668   |
| 63  | Body mass index.ab,ti.                                                                                                                                                                                                                                                                                                                                                     | 325400  |
| 64  | BMI.ab,ti.                                                                                                                                                                                                                                                                                                                                                                 | 381198  |
| 65  | Body fat.ab,ti.                                                                                                                                                                                                                                                                                                                                                            | 48883   |
| 66  | Motor performance.ab,ti.                                                                                                                                                                                                                                                                                                                                                   | 11406   |
| 67  | Activity energy expenditure.ab,ti.                                                                                                                                                                                                                                                                                                                                         | 922     |
| 68  | Level of physical activity.ab,ti.                                                                                                                                                                                                                                                                                                                                          | 6325    |
| 69  | Adherence.ab,ti.                                                                                                                                                                                                                                                                                                                                                           | 222179  |
| 70  | Immune function.ab,ti.                                                                                                                                                                                                                                                                                                                                                     | 31639   |
| 71  | Immune system.ab,ti.                                                                                                                                                                                                                                                                                                                                                       | 176983  |
| 72  | Immune parameters.ab,ti.                                                                                                                                                                                                                                                                                                                                                   | 4792    |
| 73  | Inflammation markers.ab,ti.                                                                                                                                                                                                                                                                                                                                                | 547     |
| 74  | Inflammatory markers.ab,ti.                                                                                                                                                                                                                                                                                                                                                | 45390   |
| 75  | Cardiorespiratory fitness.ab,ti.                                                                                                                                                                                                                                                                                                                                           | 8398    |
| 76  | Physical fitness.ab,ti.                                                                                                                                                                                                                                                                                                                                                    | 13831   |
| 77  | Physical activity.ab,ti.                                                                                                                                                                                                                                                                                                                                                   | 18206   |
| 78  | Cardiovascular function.ab,ti.                                                                                                                                                                                                                                                                                                                                             | 9539    |
| 79  | Cardiovascular structure.ab,ti.                                                                                                                                                                                                                                                                                                                                            | 54      |
| 80  | Range of motion.ab,ti.                                                                                                                                                                                                                                                                                                                                                     | 50904   |
| 81  | Bone mineral density.ab,ti.                                                                                                                                                                                                                                                                                                                                                | 66258   |
| 82  | Coordination.ab,ti.                                                                                                                                                                                                                                                                                                                                                        | 132369  |
| 83  | Risk of infection.ab,ti.                                                                                                                                                                                                                                                                                                                                                   | 27313   |
| 84  | Exercise capacity.ab,ti.                                                                                                                                                                                                                                                                                                                                                   | 24676   |
| 85  | Endurance.ab,ti.                                                                                                                                                                                                                                                                                                                                                           | 43790   |
| 86  | Sleep.ab,ti.                                                                                                                                                                                                                                                                                                                                                               | 296947  |
| 87  | Motor function.ab,ti.                                                                                                                                                                                                                                                                                                                                                      | 38987   |
| 88  | Ankle dorsiflexion.ab,ti.                                                                                                                                                                                                                                                                                                                                                  | 3320    |
| 89  | General health domain.ab,ti.                                                                                                                                                                                                                                                                                                                                               | 138     |
| 90  | Psychosocial health.ab,ti.                                                                                                                                                                                                                                                                                                                                                 | 2883    |
| 91  | Functional capacity.ab,ti.                                                                                                                                                                                                                                                                                                                                                 | 23699   |
| 92  | Body structure.ab,ti.                                                                                                                                                                                                                                                                                                                                                      | 1259    |
| 93  | Body function.ab,ti.                                                                                                                                                                                                                                                                                                                                                       | 1862    |
| 94  | Activity.ab,ti.                                                                                                                                                                                                                                                                                                                                                            | 3531423 |
| 95  | Participation.ab,ti.                                                                                                                                                                                                                                                                                                                                                       | 222961  |
| 96  | Freedom.ab,ti.                                                                                                                                                                                                                                                                                                                                                             | 67600   |
| 97  | Adverse effects.ab,ti.                                                                                                                                                                                                                                                                                                                                                     | 212082  |
| 98  | 37 or 38 or 39 or 40 or 41 or 42 or 43 or 44 or 45 or 46 or 47 or 48 or 49 or 50 or 51 or 52 or 53 or 54 or 55 or 56 or 57 or 58 or 59 or 60 or 61 or 62 or 63 or 64 or 65 or 66 or 67 or 68 or 69 or 70 or 71 or 72 or 73 or 74 or 75 or 76 or 77 or 78 or 79 or 80 or 81 or 82 or 83 or 84 or 85 or 86 or 87 or 88 or 89 or 90 or 91 or 92 or 93 or 94 or 95 or 96 or 97 |         |
| 99  | Systematic review.ab,ti.                                                                                                                                                                                                                                                                                                                                                   | 297356  |
| 100 | 13 and 36 and 98 and 99                                                                                                                                                                                                                                                                                                                                                    | 773     |
| 101 | limit 100 to human                                                                                                                                                                                                                                                                                                                                                         | 759     |

**Table S1.** Overall risk of bias of original studies.

|                                       |                                                                                                                                                                                                                                                                   |
|---------------------------------------|-------------------------------------------------------------------------------------------------------------------------------------------------------------------------------------------------------------------------------------------------------------------|
| <b>Wolin et al., 2010 [24]</b>        | <ul style="list-style-type: none"> <li>10/14 studies → high quality (quality assessment list with eight items)</li> </ul>                                                                                                                                         |
| <b>Chang et al., 2013 [16]</b>        | <ul style="list-style-type: none"> <li>Acceptable overall methodological quality (standardized critical appraisal instruments (Appendix I) from the Joanna Briggs Institute Meta Analysis of Statistics Assessment and Review Instrument)</li> </ul>              |
| <b>Grimshaw et al., 2016 [6]</b>      | <ul style="list-style-type: none"> <li>High risk of bias (Downs and Black Checklist and The Critical Review Form–Qualitative Studies)</li> <li>Poor overall methodological quality</li> </ul>                                                                     |
| <b>Braam et al., 2016 [5]</b>         | <ul style="list-style-type: none"> <li>High risk of bias (definitions as described in the Cochrane Handbook for Systematic Reviews of Interventions)</li> <li>Moderate to very low overall quality of the evidence (GRADE)</li> </ul>                             |
| <b>Bhardwaj et al., 2017 [15]</b>     | <ul style="list-style-type: none"> <li>Overall low-quality grading of included studies? (self-developed quality assessment tool)</li> </ul>                                                                                                                       |
| <b>Mizrahi et al., 2017 [20]</b>      | <ul style="list-style-type: none"> <li>6/13 studies → weak overall methodological quality</li> <li>4/13 → moderate</li> <li>3/13 → strong</li> </ul> <p>(Effective Public Health Practice Project Quality Assessment Tool for Quantitative Studies (EPHPP))</p>   |
| <b>Morales, et al., 2020 [21]</b>     | <ul style="list-style-type: none"> <li>Low overall methodological quality (PEDro Scale)</li> </ul>                                                                                                                                                                |
| <b>Santos et al., 2020 [22]</b>       | <ul style="list-style-type: none"> <li>Regular overall methodological quality (PEDro scale based on the Delphi method, mean score = 5.6 points, range 4-9)</li> </ul>                                                                                             |
| <b>Coombs et al., 2022 [17]</b>       | <ul style="list-style-type: none"> <li>Risk of bias: moderate for 8 RCTs and 1 CCT + high for 3 RCTs and 1 CCT (revised Cochrane risk-of-bias tool for randomized trials (ROB 2) or risk of bias in non-randomized studies of interventions (ROBINSI))</li> </ul> |
| <b>Martha et al., 2020 [19]</b>       | <ul style="list-style-type: none"> <li>High risk of bias (Cochrane Collaboration tool and ROBINS-I tool)</li> <li>Overall quality of the evidence: low and very low (determined by the GRADE system)</li> </ul>                                                   |
| <b>Morales et al., 2020 [9]</b>       | <ul style="list-style-type: none"> <li>Fair overall quality of included studies (PEDro, mean score = 4, range 0–8)</li> </ul>                                                                                                                                     |
| <b>Khaleqi-Sohi et al., 2021 [18]</b> | <ul style="list-style-type: none"> <li>Moderate overall methodological quality (PEDro, men = 6, range 5-7)</li> </ul>                                                                                                                                             |
| <b>Shi et al., 2022 [23]</b>          | <ul style="list-style-type: none"> <li>Moderate risk of bias (Cochrane Handbook for Systematic Reviews of Interventions)</li> </ul>                                                                                                                               |
